## Transmission dynamics and secondary attack rates

### 1 **Defining the role of asymptomatic SARS-CoV-2 transmission – a living systematic review**

2

3 **Authors** Xueting Qiu, PhD<sup>1\*</sup>, Ali Ihsan Nergiz<sup>2\*</sup>, Alberto Enrico Maraolo MD<sup>3</sup>, Isaac I. Bogoch,  
4 MD<sup>4</sup>, Nicola Low, MD, MSc, FFPH<sup>5</sup> Muge Cevik, MRCP<sup>6</sup>

#### 5 **Affiliations:**

6 <sup>1</sup> Center for Communicable Disease Dynamics, Department of Epidemiology, Harvard TH Chan  
7 School of Public Health, Boston, USA

8 <sup>2</sup> Cerrahpasa Medical School, Istanbul University-Cerrahpasa, Istanbul, Turkey

9 <sup>3</sup> First Division of Infectious Diseases, Cotugno Hospital, AORN dei Colli, Naples, Italy

10 <sup>4</sup> Division of Infectious Diseases, Toronto General Hospital and University of Toronto, Toronto  
11 Canada

12 <sup>5</sup> Institute of Social and Preventive Medicine, University of Bern, Bern, Switzerland

13 <sup>6</sup> Division of Infection and Global Health Research, School of Medicine, University of St.  
14 Andrews, Fife, Scotland, UK

15

16

17

18

#### 19 **Author of correspondence:**

20 Name: Dr Muge Cevik

21 Address: Division of Infection and Global Health Research, School of Medicine, University of St  
22 Andrews, Fife, Scotland, KY16 9TF

23 Telephone number: +447732800814

24 Email address: mc349@st-andrews.ac.uk

25

26 **Key words:** COVID-19, asymptomatic, transmission, SARS-CoV-2, secondary attack rate

27

## Transmission dynamics and secondary attack rates

### 28 **Abstract:**

29 **Background** Reports suggest that asymptomatic individuals (those with no symptoms at all  
30 throughout the infection) with severe acute respiratory syndrome coronavirus 2 (SARS-CoV-2)  
31 are infectious, but the extent of asymptomatic transmission requires further understanding.

32 **Purpose** This living review aims to critically appraise available data about secondary attack rates  
33 from people with asymptomatic and pre-symptomatic SARS-CoV-2 infection.

34 **Data sources** Medline, EMBASE, China Academic Journals full-text database (CNKI), and pre-  
35 print servers were searched from 30 December 2019 to 3 July 2020 using relevant MESH terms.

36 **Study selection** Studies that report on contact tracing of index cases with asymptomatic or pre-  
37 symptomatic SARS-CoV-2 infection, in either English or Chinese were included.

38 **Data extraction** Two authors independently extracted data and assessed study quality and risk  
39 of bias. We calculated the secondary attack rate as the number of contacts with SARS-CoV-2,  
40 divided by the number of contacts tested.

41 **Data synthesis** Of 928 studies identified, 19 were included. Secondary attack rates from  
42 asymptomatic index cases ranged from 0% to 2.8% (9 studies). Pre-symptomatic secondary  
43 attack rates ranged from 0.7% to 31.8% (10 studies). The highest secondary attack rates were  
44 found in contacts who lived in the same household as the index case. Other activities associated  
45 with transmission were group activities such as sharing meals or playing board games with the  
46 index case.

47 **Limitations** We excluded some studies because the index case or number of contacts were  
48 unclear. Owing to the anticipated heterogeneity, we did not produce a summary estimate of the  
49 included studies.

50 **Conclusion** Asymptomatic patients can transmit SARS-CoV-2 to others, but our findings  
51 indicate that such individuals are responsible for fewer secondary infections than people with  
52 symptoms in the same studies.

53 **Systematic review registration** PROSPERO CRD42020188168

54 **Funding:** No funding was received

55

56

## Transmission dynamics and secondary attack rates

### 57 **Introduction:**

58 Severe Acute Respiratory Syndrome Coronavirus 2 (SARS-CoV-2) demonstrates efficient  
59 transmission in populations without effective public health interventions; basic reproduction  
60 numbers ( $R_0$ ) values range between 2-3 (1). While asymptomatic transmission has been  
61 described as the “Achilles’ heel” of control efforts during this pandemic, the extent to which  
62 transmission of SARS-CoV-2 by people without symptoms drives this pandemic remains  
63 uncertain (2). SARS-CoV-2 infection that is asymptomatic at the time of laboratory testing is  
64 widely reported (3); however, studies that follow infected people over time suggest that many  
65 infections are not asymptomatic throughout the entire disease course, and a large proportion of  
66 these individuals ultimately develop a diverse range of symptoms (4-7). A living systematic  
67 review of studies published up to 10 June 2020, estimated that 20% (95% CI 17 to 25%) of  
68 people who become infected with SARS-CoV-2 remain asymptomatic throughout infection (7).

69 One of the barriers to understanding the role of asymptomatic transmission is the lack of  
70 consistency in case definitions. While symptom severity exists on a spectrum, individuals  
71 infected with SARS-CoV-2 can be miscategorized as asymptomatic, when they are  
72 paucisymptomatic. For instance, Gudbjartsson et al. reported that approximately half of the  
73 participants in their population screening in Iceland had symptoms despite asking symptomatic  
74 patients not to participate (3). Additionally, studies that define symptomatic disease narrowly as  
75 fever, cough, or shortness of breath might overestimate the proportion without symptoms (3, 8).  
76 It is increasingly clear that some individuals experience more diverse symptoms, including taste  
77 and smell disturbance or myalgia, either for the entire course of illness or preceding respiratory  
78 symptoms. These symptoms can be so mild and insidious that they do not limit patients’ daily  
79 activities (4, 9). The situation is further complicated by subjective patient perception and  
80 differences between studies in the elicitation and reporting of symptoms.

81 There are reports describing asymptomatic individuals with SARS-CoV-2 who are infectious (10)  
82 and who have infected one or more contacts (11), but the extent and significance of  
83 asymptomatic transmission requires further understanding. The aim of this review is to

## Transmission dynamics and secondary attack rates

84 summarize the available evidence about secondary attack rates (defined as the probability that  
85 an infected individual will transmit the disease to a susceptible individual) amongst the contacts  
86 of asymptomatic or pre-symptomatic individuals with SARS-CoV-2 to provide information about  
87 how contagious they are, and their role in driving the pandemic.

88

### 89 **Methods:**

90 Systematic review was registered in PROSPERO on 8 June 2020 (CRD42020188168) and will  
91 be updated three times a year as a living systematic review (12). The larger review aims to  
92 answer transmission dynamics of SARS-CoV-2. The analysis in this report addresses one of the  
93 review questions; to identify asymptomatic and pre-symptomatic secondary attack rate.

94

### 95 **Definitions**

96 We defined “asymptomatic” as an individual with laboratory-confirmed SARS-CoV-2 infection  
97 who does not demonstrate symptoms throughout their entire course of infection, or after 14 days  
98 of follow up; “paucisymptomatic” as an individual with laboratory-confirmed SARS-CoV-2  
99 infection with mild symptoms, and “pre-symptomatic” as an individual who reports no symptoms  
100 at the time of the initial positive test result, but who goes on to develop recognised COVID-19  
101 symptoms. We used these definitions to categorize the index cases. Secondary attack rate was  
102 defined as the number of new SARS-CoV-2 infection cases among susceptible contacts of  
103 primary cases divided by the total number of susceptible contacts.

104

### 105 **Search Strategy**

106 We retrieved articles about transmission of SARS-CoV-2 infection through systematic searches  
107 of eight databases: Medline, EMBASE, Europe PMC, Web of Science, SCOPUS, Chinese  
108 database (CNKI), and preprint servers (MedRxiv, BioRxiv) using relevant Medical Subject  
109 Headings (MeSH) terms (Supplementary material). The initial search was completed from 30  
110 December 2019 to 21 May 2020, searches were repeated on 8 June 2020 and 3 July 2020,  
111 owing to the rapidly increasing numbers of studies.

112

## Transmission dynamics and secondary attack rates

### 113 **Study Selection**

114 Studies were eligible if they met the inclusion criteria: (1) report on Coronavirus disease 2019  
115 (COVID-19) or SARS-CoV-2 infection and (2) report an outbreak investigation or contact tracing  
116 study. Exclusion criteria were: (1) review articles; (2) observational studies providing only the  
117 proportion of individuals infected; (3) studies that do not indicate the number of contacts or  
118 secondary infections; and (4) reports in media sources. We also manually screened the  
119 references of the included original studies and reviews to identify additional eligible studies.

120

### 121 **Data Extraction**

122 Two authors (XQ and AIN) independently reviewed reports by title and abstract for relevance,  
123 with at least 20% of all reports being screened in duplicate to ensure consistency. Two authors  
124 then independently read the full text report of all studies not excluded by title and abstract, to  
125 consider eligibility for inclusion. Any disagreements regarding study inclusion were resolved  
126 through discussion with a third author (MC). Data were extracted onto a standardized form. From  
127 each study, the following variables were extracted: the name of the first author, year of  
128 publication, country, sample size, details of index cases (categorised as asymptomatic, pre-  
129 symptomatic and symptomatic); event details such as environment, transmission details; number  
130 of contacts, number of secondary cases. If these data were not reported, we contacted authors  
131 to request them.

132

### 133 **Risk of bias in included studies**

134 Two authors (XQ and AIN) independently assessed completeness of reporting and risks of bias,  
135 using an adapted version of the Joanna Briggs Institute Critical Appraisal Checklist for Case  
136 Series (Supplementary material). Any disagreements were resolved through discussion with a  
137 third author (MC).

138

### 139 **Data synthesis and statistical analysis**

140 The studies are summarized in text and table form, descriptive statistics were completed for key  
141 outcome measures. Secondary attack rates were computed from raw data in each study, dividing

## Transmission dynamics and secondary attack rates

142 the number of infected contacts of primary cases by the total number of susceptible exposed  
143 contacts. A 95% confidence interval [CI] was calculated by using the Clopper-Pearson method  
144 (13, 14). Secondary attack rates are presented as a proportion along with 95% CIs in forest  
145 plots, stratified according to the features of index cases: truly asymptomatic or pre-symptomatic.  
146 A 95% prediction interval is shown, but a pooled estimate was suppressed due to the expected  
147 high methodological and clinical heterogeneity among the studies. A prediction interval is an  
148 index of dispersion, providing information on how widely the true effect size varies. It is an  
149 estimate of the range of values in which a future observation will fall (15). Analyses were carried  
150 out through the Comprehensive Meta-analysis (CMA) software program (Version 3, Biostat,  
151 Englewood, NJ, USA) and forest plots were created by means of Excel from Office 2019  
152 (Microsoft, Redmond, WA, USA).

153

### 154 **Results:**

155 The systematic search identified 928 potentially relevant articles and 790 records were screened  
156 after removal of duplicates. Of 188 articles retrieved for full-text review and assessed for  
157 eligibility, 83 studies were included in the overall systematic review, and among those we  
158 identified 19 studies that indicated contact tracing of asymptomatic or pre-symptomatic index  
159 cases. The remaining studies are not reported in this systematic review. The number of selected  
160 papers at each step of the screening and eligibility are reported in the flow diagram (Figure 1).

161

162 Of these 19 studies that indicated contact tracing of asymptomatic or pre-symptomatic index  
163 cases, after reviewing the details and contacting the authors, we re-classified three studies from  
164 asymptomatic to pre-symptomatic as the index cases developed symptoms later during the  
165 disease course (16-18).

166

### 167 **Summary of secondary attack rates of asymptomatic index cases**

168 Of the 19 studies included, contact tracing of index patients who were identified as asymptomatic  
169 cases, according to our definition, was reported in nine (Table 1, Figure 1) (6, 11, 19-25). All  
170 except one tested all close contacts for SARS-CoV-2, regardless of symptoms (23). Cheng et al.

## Transmission dynamics and secondary attack rates

171 only tested symptomatic cases, but they also tested high risk populations regardless of  
172 symptoms including the household and hospital contacts (23). Six studies reported on household  
173 contacts, two studies included hospital contacts and two studies included non-household close  
174 contacts.

175

176 Three studies identified no secondary cases after following up 17, 91 and 455 close contacts of  
177 asymptomatic index cases (asymptomatic secondary attack rate of 0%) (21-23). Of those, two  
178 studies demonstrated higher symptomatic secondary attack rates; Cheng et al. demonstrated  
179 that mild cases had a secondary attack rate of 3.8% (95% CI 1.1, 12.8%) and severe cases had  
180 4% (95% CI 1.0, 15.8%) secondary attack rate (23), while Park et al. showing household  
181 symptomatic secondary attack rate of 16.2% (95% CI 11.6, 22.0%) (21). In another study, 305  
182 contacts of 8 asymptomatic cases were followed up, identifying one secondary case (secondary  
183 attack rate 0.3% (95% CI 0.0, 1.8%) (25). In the same study, mild, moderate and severe attack  
184 rates were 3.3%, 5.6% and 6.2%, respectively. Zhang et al. followed up 119 close contacts of 12  
185 asymptomatic index cases and identified one secondary case, an asymptomatic secondary  
186 attack rate of 0.8% (95% CI 0.0, 4.6). In the same study, the secondary attack rate was 3.5%  
187 (95% CI 1.5-8.0) for those with mild, 5.7% (95% CI 2.5, 12.8%) for those with moderate, and  
188 4.5% (95% CI 0.8, 21.8%) for those with severe symptoms (6). In this study, close contacts that  
189 lived with an index case had 12 times the risk of infection as those who did not live with the index  
190 case (RR 12.5 - 95% CI 1.6, 100.8) and those who had frequent contact with an index case-  
191 patient, and those who had more than 5 contacts had 29 times the risk of infection as those with  
192 fewer contacts (RR 29.0 - 95% CI 3.6, 232.3). Two studies indicated an asymptomatic secondary  
193 attack rate of 1% and 1.9% (19, 20). Chaw et al. reported asymptomatic and pre-symptomatic  
194 contacts together. The authors clarified that 3 asymptomatic index cases and their 106 close  
195 contacts were followed up, leading to 3 secondary cases, a secondary attack rate of 2.8% (95%  
196 CI 0.06, 8.0%). In this study, the overall secondary attack rate was 10.6% in the household  
197 setting, which was higher for symptomatic cases (14.4%, 95% CI 8-8, 19-9%) than that of  
198 asymptomatic cases and for non-household contacts 0.7 (95% CI 0.1, 1.3) (11). Zeng et al.  
199 conducted the largest contact tracing study, following up 753 close contacts of asymptomatic

## Transmission dynamics and secondary attack rates

200 index cases and identified one secondary case, an asymptomatic secondary attack rate of 0.13%  
201 (95% CI 0.0, 0.7%). In the same study, the secondary attack rate for all contacts was 2.0% (95%  
202 CI 1.8, 2.3%) for confirmed symptomatic index cases (24).

203

### 204 **Summary of pre-symptomatic secondary attack rates**

205 Thirteen papers reported either outbreak investigations or contact tracing studies reporting  
206 transmission from an index case during the pre-symptomatic period (11, 16, 18, 23, 26-33)  
207 (Table 2). Of those, ten studies followed up 22 to 585 close contacts whose initial exposure  
208 occurred before symptom onset of the index case (Figure 3). These studies reported secondary  
209 attack rates ranging from 0% to 31.8%. Even in studies that followed up large numbers of  
210 people, including community contacts, the majority of secondary cases identified were from the  
211 same household or among friend gatherings. In these studies, having meals together, or playing  
212 cards with the index case were exposure activities associated with transmission. Hong et al.  
213 demonstrated lower secondary attack rates in those wearing masks (8.1% vs. 19.0%;  $p < 0.001$ )  
214 (27). The remaining three studies exclusively reported family cluster outbreaks (26, 28, 29);  
215 these investigations did not test contacts outside the household and it is challenging to truly  
216 differentiate transmission during the pre-symptomatic period from symptomatic transmission in  
217 the household setting (Supplementary Figure 1).

218

### 219 **Quality assessment**

220 All but 3 studies were contact tracing studies. All papers included a clear definition of  
221 symptomatic and asymptomatic cases, number of secondary cases and number of contacts. The  
222 majority of studies identified index cases with a clear diagnosis, had an acceptable case  
223 definition and sufficiently followed up close contacts (for a minimum of 14 days). However, in  
224 some studies the definition of close contact and setting of transmission was not provided. In  
225 addition, it was unclear in four reports whether all potential close contacts were included, which  
226 could result in an underestimation of the secondary attack rate. (Supplementary Table 1)

227

### 228 **Discussion:**



## Transmission dynamics and secondary attack rates

229 This systematic review provides comprehensive data on secondary attack rates arising from  
230 people with asymptomatic and pre-symptomatic SARS-CoV-2 infection. While asymptomatic  
231 patients can transmit the virus to others (34), the findings from nine studies in this review found  
232 secondary attack rates of zero to 2.8%, compared with secondary attack rates of 0.7% to 16.2%  
233 in symptomatic cases in the same studies. These findings suggest that individuals who are  
234 asymptomatic throughout the disease course are responsible for fewer secondary infections than  
235 symptomatic and pre-symptomatic cases. For contacts whose exposure occurred before  
236 symptom onset of the index case, transmission events were associated with living with the index  
237 case or group activities such as sharing meals and playing board games.

238

239 The findings of our study raise the question about whether the low secondary attack rates from  
240 asymptomatic individuals result from low infectiousness or a shorter duration of infectiousness. In  
241 another living systematic review, of studies published up to 6 June 2020, we found that cases  
242 with asymptomatic infection have a shorter duration of RNA shedding than symptomatic  
243 individuals (35). Asymptomatic patients may therefore be contagious but for a shorter duration,  
244 limiting the duration they could transmit to their contacts. However, there remain limited data on  
245 the shedding of infectious virus in asymptomatic individuals to quantify their transmission  
246 potential, which would be needed to inform policy on quarantine duration in the absence of  
247 testing. Low likelihood of transmission from asymptomatic index cases combined with high  
248 symptomatic secondary attack rates emphasises that, especially in the context of limited  
249 resources, approaches should be targeted predominantly on identifying and immediately  
250 isolating patients with prodromal or mild symptoms and their contacts, which may avert a  
251 significant number of community transmission clusters (36). These findings are in line with  
252 previous contact tracing and outbreak investigations suggesting that many SARS-CoV-2-infected  
253 people either do not contribute to an onward transmission or have minimal potential to do so (37,  
254 38), and a large number of cases are often caused by a small number of infected patients.  
255 Clusters have become a prominent characteristic of SARS-CoV-2 which distinguishes it from  
256 seasonal influenza, although a similar pattern was also observed in SARS-CoV and MERS-CoV.

257

## Transmission dynamics and secondary attack rates

258 The modelling studies suggest that it isn't possible to have epidemics of this size without  
259 substantial pre-symptomatic transmission. Viral load dynamics of SARS-CoV-2 derived from  
260 confirmed cases suggest that peak viral loads are detected at the start of symptom onset up to  
261 day 5 of illness, suggesting highest infectiousness potential in just before or within the first few  
262 days after symptom onset (35). So far several contact tracing studies emphasize that the highest  
263 risk of transmission occurs during the prodromal phase or early in the disease course (39, 40).  
264 For instance, in a prospective contact tracing study of 100 confirmed cases of COVID-19 and  
265 2761 close contacts no secondary cases were identified when the exposure occurred more than  
266 5 days after the symptom onset (23). Our findings therefore have important implications from a  
267 public health perspective. In settings such as nursing homes, homeless shelters, prisons, cruise  
268 ships and meat-packing plants in which many people spend prolong period of time together in  
269 the same environment including sleeping, dining and sharing common facilities, and where  
270 several outbreaks have been documented, pre-symptomatic transmission may contribute  
271 substantially to transmission (38, 41). In these settings, when infection develops, most patients  
272 are already inside the facility with high viral loads that increase the risk of onward transmission.  
273 This highlights the importance of mitigation measures and surveillance in these settings to  
274 identify those patients early in the disease course to prevent onward transmission inside the  
275 facility.

276

277 This systematic review has several strengths. Firstly, this is a living systematic review examining  
278 the transmission of SARS-CoV-2 through contact tracing and outbreak investigation studies.  
279 Secondly, we only included studies with clear case definitions, which indicated the number of  
280 contacts and secondary cases. The most important study limitation relates to the limitations of  
281 the evidence itself. We excluded studies in which the index case was unclear, or the numbers of  
282 contacts were not provided. Owing to anticipated heterogeneity, we did not produce a summary  
283 estimate of the included studies. The estimates from individual studies are also subject to  
284 limitations, such as imprecision resulting from small study size, and sources of bias in the  
285 estimation of the true secondary attack rate.

286

## Transmission dynamics and secondary attack rates

287 We identified two systematic reviews that investigated asymptomatic transmission, with different  
288 research questions and search terms. One review included studies published up to 10 June 2020  
289 and identified five studies that directly compared secondary attack rates between asymptomatic  
290 and symptomatic index cases; all were included in our review (7). The summary risk ratios for  
291 asymptomatic versus symptomatic (0.35, 95% CI 0.10, 1.27) and pre-symptomatic versus  
292 symptomatic (0.63, 95% CI 0.18, 2.26) are consistent with our findings. The second review  
293 estimated only household secondary attack rates and included studies published up to 29 July  
294 2020 (42). Of three studies that included asymptomatic index cases, two were included in our  
295 review. We excluded one of the studies because the number of contacts of asymptomatic index  
296 cases was not specified; we have not yet received details of the study after contacting the  
297 authors. Advantages of our review over these two studies are inclusion of studies published in  
298 Chinese, search terms that aimed to capture studies specifically estimating secondary attack  
299 rates in different settings and clarification about symptomatology of index cases through direct  
300 contact with the authors.

301

302 Important barriers to more accurate quantification of the contribution of asymptomatic and pre-  
303 symptomatic SARS-CoV-2 transmission relate to the different definitions used to estimate the  
304 asymptomatic fraction of infections, not taking into account mild or atypical symptoms, or the use  
305 of estimates from cross-sectional studies without follow up (43). Therefore, in order to  
306 understand the extend of asymptomatic infections and transmission, a clear and comprehensive  
307 case definition, which assesses the presence or absence of a defined list of major and minor or  
308 atypical symptoms is required in future studies.

309

310 In summary, whilst asymptomatic transmission is a major concern for SARS-CoV-2 community  
311 spread, secondary attack rates from those who remain asymptomatic throughout their course of  
312 infection are low suggesting limited infectiousness. Although it is difficult to estimate the  
313 proportion of pre-symptomatic transmission, these patients are likely to be highly infectious  
314 around the time of symptom onset and appear to transmit efficiently, especially within  
315 households. Those with mild symptoms, who feel otherwise well, still carry large amounts of virus

## Transmission dynamics and secondary attack rates

316 in the upper respiratory tract, which might contribute to easy and rapid spread of SARS-CoV-2  
317 (20). Future clinical studies should incorporate clear definitions and assess a broad range of  
318 symptoms associated with COVID-19, should include longitudinal follow up of patients, and  
319 calculate secondary attack rates for a wider range of settings and populations.

320

321 **Conflict of Interest:** The authors declare that there is no conflict of interest

322

323 **Funding:** No funding was received

324

325 **Acknowledgements:** We would like to thank the authors of Chau et al. (Dr Tan Le Van),  
326 Mandić-Rajčević et al. (Dr Stefan Mandić-Rajčević), Chaw et al. (Dr Liling Chaw) for providing  
327 further details about asymptomatic cases in their reports also Prof Stephen Gillespie for his  
328 comments on the first draft of this manuscript. We would like to acknowledge Dr. Shuang Jin for  
329 searching and downloading Chinese database for this review.

330

331 **Contribution statement:**

332 X Qiu: investigation, data curation, writing – original draft; A Nergiz: investigation, data curation,  
333 writing – review and editing; A. E. Maraolo: methodology, formal analysis, writing – original draft;  
334 I. Bogoch and N. Low: interpretation, writing – review and editing; M. Cevik: conceptualisation,  
335 methodology, investigation, writing – original draft, supervision.

336

337

338 **Figure legends:**

339 **Figure 1: Flowchart describing the study design process**

340 **Figure 2: Secondary attack rates from asymptomatic index cases to their contacts**

341 **Figure 3: Secondary attack rates from pre-symptomatic index cases to their contacts**

342 **Table 1: Transmission from truly asymptomatic index cases**

|                                   | <b>Index Cases</b> | <b>Environment</b>          | <b>Number of contacts</b> | <b>Number of Secondary cases</b> | <b>Asymptomatic SAR (95% CI)</b>          | <b>Symptomatic SAR (95% CI)</b>                                                        |
|-----------------------------------|--------------------|-----------------------------|---------------------------|----------------------------------|-------------------------------------------|----------------------------------------------------------------------------------------|
| <b>Chaw et al. * (11)</b>         | 3                  | Household                   | 106                       | 3                                | 2.8% (0.06, 8.0)                          | 14.4% (8.8, 19.9)                                                                      |
|                                   |                    | Non-household               |                           |                                  |                                           | 0.7% (0.01, 1.3)                                                                       |
| <b>Cheng et al.(23)</b>           | 9                  | Non-household               | 91                        | 0                                | 0% (0.0, 4.1)                             | Mild 3.76 (1.1-12.8)<br>Severe 3.99 (1.0-15.8)                                         |
| <b>Gao et al.(22)</b>             | 1                  | Household and healthcare    | 455                       | 0                                | 0% (0.0, 0.08)                            |                                                                                        |
| <b>Jiang et al.(19)</b>           | 3                  | Household                   | 195                       | 2                                | 1% (0.1, 3.7)                             |                                                                                        |
| <b>Luo et al. (25)</b>            | 8                  | Household and non-household | 305                       | 1                                | 0.33% (0.0, 1.8)<br>OR (0.29 (0.04, 2.2)) | Mild 3.3% (OR 0.48 (0.28, 0.82))<br>Mod 5.6% (OR 1.0)<br>Sev 6.2% (OR 1.19 (0.7, 2.1)) |
| <b>Mandić-Rajčević et al.(20)</b> | 1                  | Healthcare                  | 53                        | 1                                | 1.9% (0.0,10.0)                           |                                                                                        |
| <b>Park et al.(21)</b>            | 4                  | Household                   | 17                        | 0                                | 0% (0.0, 19.5)                            | 16.2 % (11.6–22.0)                                                                     |
| <b>Zeng et al. (24)</b>           |                    | All contacts                | 753                       | 1                                | 0.13% (0.0, 0.7)                          | 2.02% 1.8, 2.3)                                                                        |
| <b>Zhang et al.(6)</b>            | 12                 | Household                   | 119                       | 1                                | 0.8% (0.0, 4.6)                           | Mild 3.5% (1.5, 8.0)<br>Mod 5.7% (2.5, 12.8)<br>Severe 4.5% (0.8, 21.8)                |

343 Abbreviations: CI, confidence interval; OR, odds ratio; SAR, secondary attack rate; sev, severe

344 \* authors contacted for more details

345 Table 2: Transmission during pre-symptomatic period

|                                       | Index Cases | Environment                 | Number of contacts | Number of Secondary cases | Pre-symptomatic SAR (95% CI) | Secondary cases                        |
|---------------------------------------|-------------|-----------------------------|--------------------|---------------------------|------------------------------|----------------------------------------|
| <b>Contract-tracing investigation</b> |             |                             |                    |                           |                              |                                        |
| Chaw et al.* (11)                     | 7           | Household and non-household | 585                | 15                        | 2.56% (1.4, 4.2)             |                                        |
| Cheng et al.(23)                      | NR          | Household and non-household | 299                | 2                         | 0.7% (0.1, 2.4)              |                                        |
| Hong L et al.(27)                     | 41          | Household and non-household | 197                | 24                        | 12.2% (8.0, 17.6)            | Friends, family, card playing partners |
| Huang et al.(16)                      | 1           | Friends                     | 22                 | 7                         | 31.8% (13.0, 54.9)           | Shared meal with index                 |
| Pang et al. (30)                      | 1           | Household and non-household | 103                | 6                         | 5.8% (2.2, 12.2)             | Living together or sharing meal        |
| Park et al. (21)                      | 4           | Household                   | 11                 | 0                         | 0% (0.0, 2.8)                |                                        |
| Qian et al. (31)                      | 1           | Household and non-household | 137                | 10                        | 7.3% (3.6, 13.0)             | Living together or sharing meal        |
| Yang et al. (32)                      | 2           | Household and non-household | 123                | 6                         | 4.9% (1.8, 10.3)             | All secondary cases lived together     |
| Ye et al. (18)                        | 1           | Family                      | 44                 | 4                         | 9.1% (2.5, 21.4)             | Extended family                        |
| Zhao et al (33)                       | 1           | Friends                     | 15                 | 4                         | 26.7% (7.8, 55.1)            | Meal and Mahjong game gathering        |
| <b>Family outbreak investigation</b>  |             |                             |                    |                           |                              |                                        |
| Chen M et al.(26)                     | 1           | Household                   | 3                  | 2                         | 66.7% (9.4, 99.2)            | Family cluster outbreak                |

Transmission dynamics and secondary attack rates

|                           |   |           |   |   |                  |                         |
|---------------------------|---|-----------|---|---|------------------|-------------------------|
| <b>Li P et al.(28)</b>    | 1 | Household | 5 | 4 | 80% (28.4, 99.5) | Family cluster outbreak |
| <b>Qian G et al. (29)</b> | 2 | Household | 4 | 3 | 75% (10.4, 99.4) | Family cluster outbreak |

346 Abbreviations: CI, confidence interval; SAR, secondary attack rate

347 \* authors contacted for more details

348

349

Transmission dynamics and secondary attack rates

350 **Figure 1. Flowchart describing inclusion and exclusion of studies at each stage of the**  
 351 **review**

352  
 353  
 354  
 355  
 356  
 357  
 358  
 359  
 360  
 361  
 362  
 363  
 364  
 365  
 366  
 367  
 368  
 369  
 370  
 371  
 372  
 373  
 374  
 375  
 376  
 377  
 378  
 379  
 380  
 381  
 382  
 383  
 384  
 385  
 386  
 387  
 388  
 389  
 390  
 391  
 392  
 393  
 394  
 395  
 396  
 397

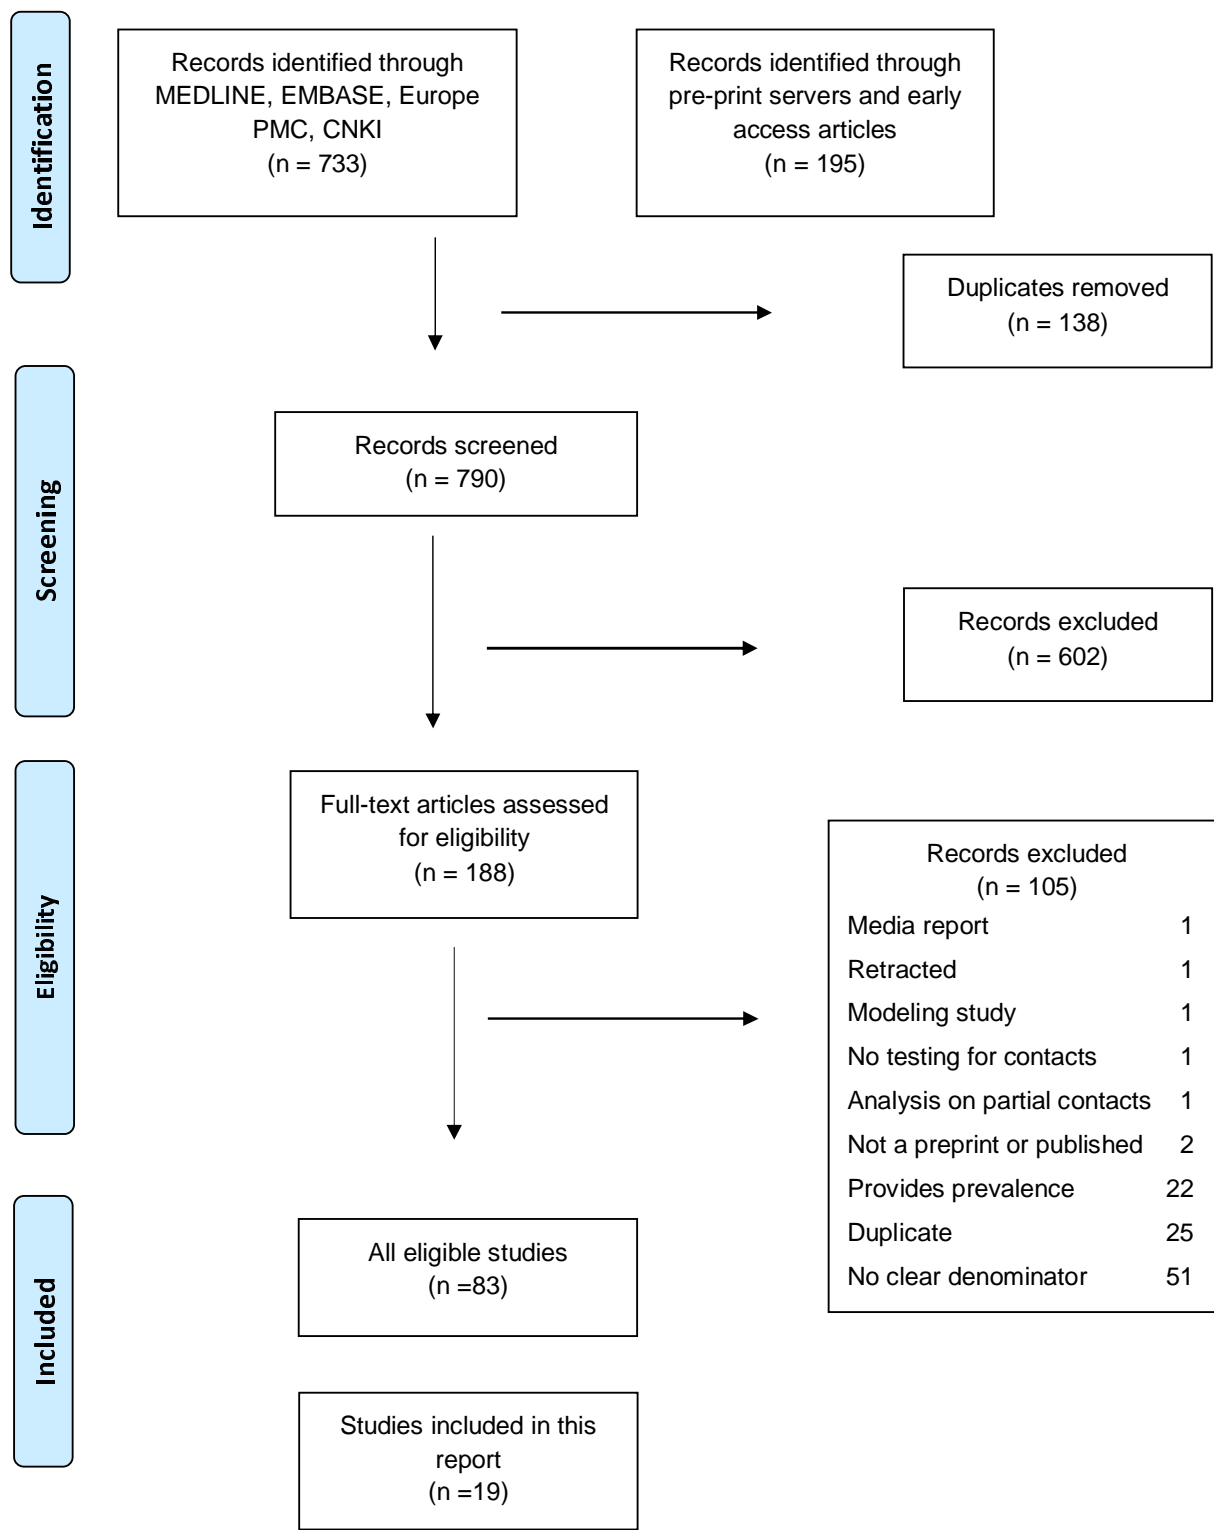



## Transmission dynamics and secondary attack rates

398 **Figure 2: Secondary attack rates from asymptomatic index cases to their contacts**

399

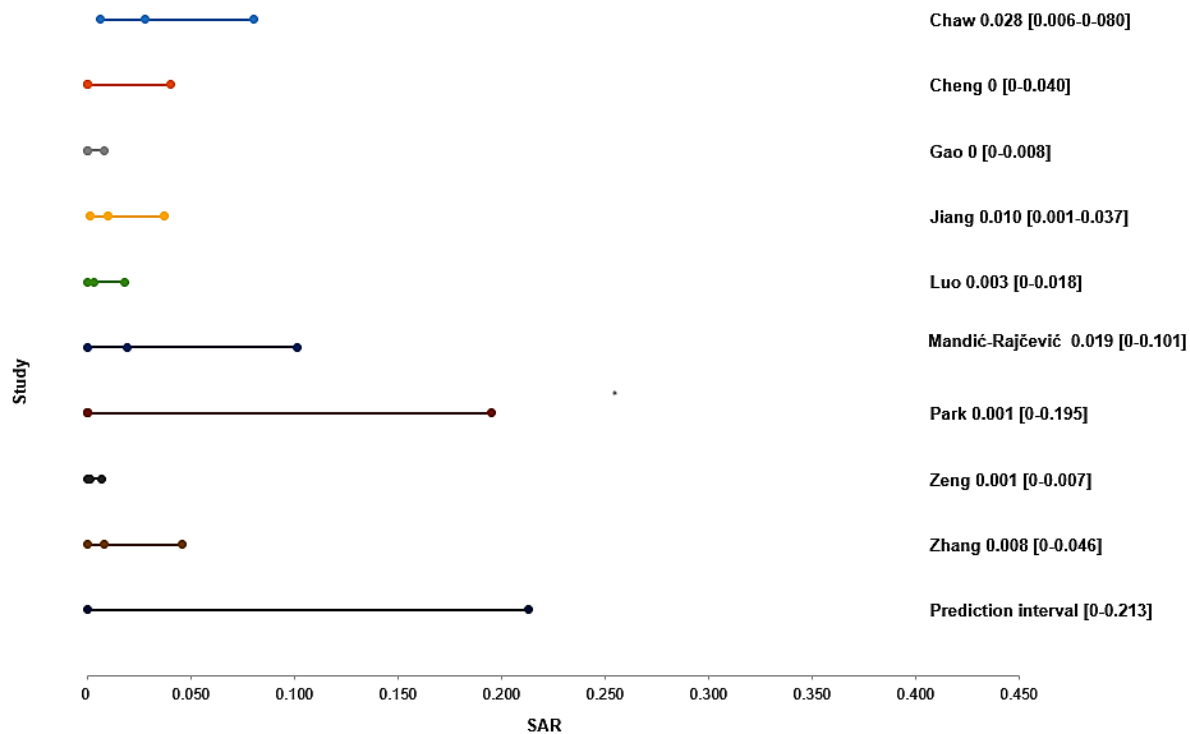

400

401 For each study the SAR is reported with its 95% CI.

402 A prediction interval at the bottom of the forest is depicted.

403

404

405

406

407

408

409

410

411

412

413

414

415

416

417

418

419

420

421

422

423

424

425

### Transmission dynamics and secondary attack rates

426 **Figure 3: Secondary attack rates from pre-symptomatic index cases to their contacts**

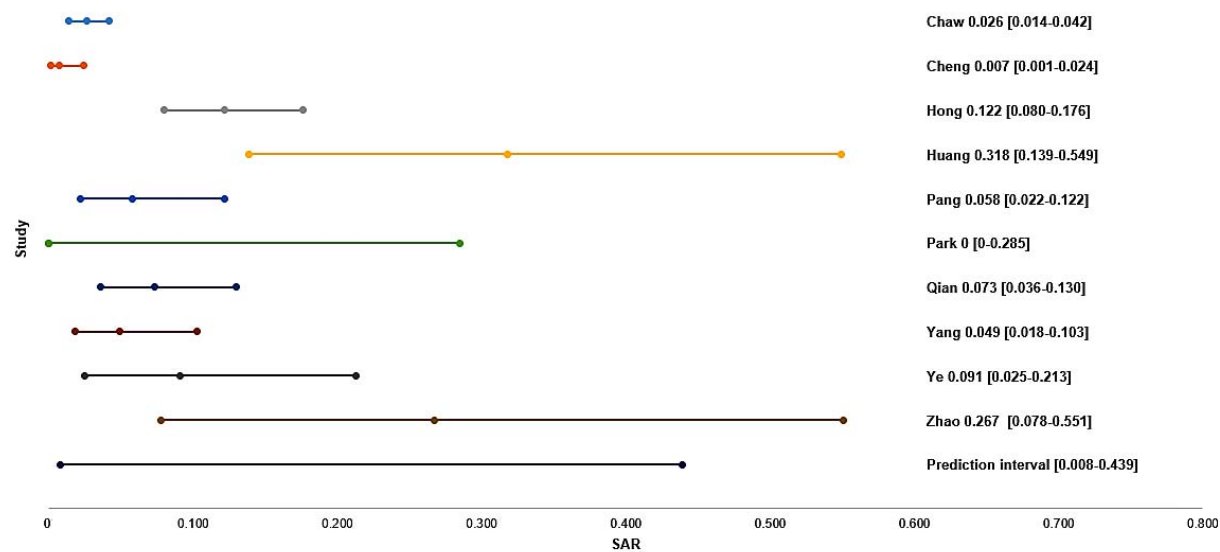

427

428 For each study the SAR is reported with its 95% CI.

429 A prediction interval at the bottom of the forest is depicted.

430

431

432

433

434

435

436

437

438

439

440

441

442

443

444

445

446

## Transmission dynamics and secondary attack rates

### 447 **References:**

- 448 1. Ruan L, Wen M, Zeng Q, Chen C, Huang S, Yang S, et al. New Measures for the  
449 Coronavirus Disease 2019 Response: A Lesson From the Wenzhou Experience.  
450 *Clinical Infectious Diseases*. 2020.
- 451 2. Gandhi M, Yokoe DS, Havlir DV. Asymptomatic Transmission, the Achilles' Heel of  
452 Current Strategies to Control Covid-19. *New England Journal of Medicine*.  
453 2020;382(22):2158-60.
- 454 3. Gudbjartsson DF, Helgason A, Jonsson H, Magnusson OT, Melsted P, Norddahl GL,  
455 et al. Spread of SARS-CoV-2 in the Icelandic Population. *N Engl J Med*. 2020.
- 456 4. Cevik M, Bamford CGG, Ho A. COVID-19 pandemic-a focused review for clinicians.  
457 *Clin Microbiol Infect*. 2020.
- 458 5. Wang Y, Liu Y, Liu L, Wang X, Luo N, Li L. Clinical Outcomes in 55 Patients With  
459 Severe Acute Respiratory Syndrome Coronavirus 2 Who Were Asymptomatic at  
460 Hospital Admission in Shenzhen, China. *The Journal of Infectious Diseases*. 2020.
- 461 6. Zhang W, Cheng W, Luo L, Ma Y, Xu C, Qin P, et al. Secondary Transmission of  
462 Coronavirus Disease from Presymptomatic Persons, China. *Emerg Infect Dis*.  
463 2020;26(8).
- 464 7. Buitrago-Garcia DC, Egli-Gany D, Counotte MJ, Hossmann S, Imeri H, Ipekci AM, et  
465 al. The role of asymptomatic SARS-CoV-2 infections: rapid living systematic review  
466 and meta-analysis. *medRxiv*. 2020:2020.04.25.20079103.
- 467 8. Lavezzo E, Franchin E, Ciavarella C, Cuomo-Dannenburg G, Barzon L, Del Vecchio  
468 C, et al. Suppression of COVID-19 outbreak in the municipality of Vo, Italy. *medRxiv*.  
469 2020:2020.04.17.20053157.
- 470 9. Kim ES, Chin BS, Kang CK, Kim NJ, Kang YM, Choi JP, et al. Clinical Course and  
471 Outcomes of Patients with Severe Acute Respiratory Syndrome Coronavirus 2  
472 Infection: a Preliminary Report of the First 28 Patients from the Korean Cohort Study  
473 on COVID-19. *Journal of Korean Medical Science*. 2020;35(13):e142.
- 474 10. Arons MM, Hatfield KM, Reddy SC, Kimball A, James A, Jacobs JR, et al.  
475 Presymptomatic SARS-CoV-2 Infections and Transmission in a Skilled Nursing  
476 Facility. *New England Journal of Medicine*. 2020.
- 477 11. Chaw L, Koh WC, Jamaludin SA, Naing L, Alikhan MF, Wong J. SARS-CoV-2  
478 transmission in different settings: Analysis of cases and close contacts from the  
479 Tablighi cluster in Brunei Darussalam. 2020.
- 480 12. Elliott JH, Synnot A, Turner T, Simmonds M, Akl EA, McDonald S, et al. Living  
481 systematic review: 1. Introduction&#x2014;the why, what, when, and how. *Journal of*  
482 *Clinical Epidemiology*. 2017;91:23-30.
- 483 13. Dean N, Pagano M. Evaluating Confidence Interval Methods for Binomial Proportions  
484 in Clustered Surveys. *Journal of Survey Statistics and Methodology*. 2015;3(4):484-  
485 503.
- 486 14. Brown LD, Cai TT, DasGupta A. Interval Estimation for a Binomial Proportion.  
487 *Statistical Science*. 2001;16(2):101-17.
- 488 15. Int'Hout J, Ioannidis JPA, Rovers MM, Goeman JJ. Plea for routinely presenting  
489 prediction intervals in meta-analysis. *BMJ Open*. 2016;6(7):e010247.
- 490 16. Huang L, Zhang X, Zhang X, Wei Z, Zhang L, Xu J, et al. Rapid asymptomatic  
491 transmission of COVID-19 during the incubation period demonstrating strong  
492 infectivity in a cluster of youngsters aged 16-23 years outside Wuhan and  
493 characteristics of young patients with COVID-19: A prospective contact-tracing study.  
494 *Journal of Infection*. 2020;80(6):e1-e13.
- 495 17. Li C, Ji F, Wang L, Wang L, Hao J, Dai M, et al. Asymptomatic and Human-to-  
496 Human Transmission of SARS-CoV-2 in a 2-Family Cluster, Xuzhou, China.  
497 *Emerging Infectious Diseases*. 2020;26(7):31.
- 498 18. Ye F, Xu S, Rong Z, Xu R, Liu X, Deng P, et al. Delivery of infection from  
499 asymptomatic carriers of COVID-19 in a familial cluster. *International Journal of*  
500 *Infectious Diseases*. 2020;94:133-8.

## Transmission dynamics and secondary attack rates

- 501 19. Jiang XL, Zhang XL, Zhao XN, Li CB, Lei J, Kou ZQ, et al. Transmission potential of  
502 asymptomatic and paucisymptomatic SARS-CoV-2 infections: a three-family cluster  
503 study in China. *Journal of Infectious Diseases*. 2020;22:22.
- 504 20. Mandic-Rajcevic S, Masci F, Crespi E, Franchetti S, Longo A, Bollina I, et al. Contact  
505 tracing and isolation of asymptomatic spreaders to successfully control the COVID-  
506 19 epidemic among healthcare workers in Milan (Italy). 2020.
- 507 21. Park SY, Kim YM, Yi S, Lee S, Na BJ, Kim CB, et al. Coronavirus Disease Outbreak  
508 in Call Center, South Korea. *Emerging Infectious Diseases*. 2020;26(8):23.
- 509 22. Gao M, Yang L, Chen X, Deng Y, Yang S, Xu H, et al. A study on infectivity of  
510 asymptomatic SARS-CoV-2 carriers. *Respiratory medicine*. 2020:106026-.
- 511 23. Cheng H-Y, Jian S-W, Liu D-P, Ng T-C, Huang W-T, Lin H-H, et al. Contact Tracing  
512 Assessment of COVID-19 Transmission Dynamics in Taiwan and Risk at Different  
513 Exposure Periods Before and After Symptom Onset. *JAMA Internal Medicine*. 2020.
- 514 24. 曾晶, 邱乐平, 邹晏, 张光霞, 吴先萍, 胥馨尹, et al. [Zeng et  
515 al]四川省新型冠状病毒肺炎密切接触者分析. *中国公共卫生*. 2020;36(04):503-6.
- 516 25. Luo L, Liu D, Liao X, Wu X, Jing Q, Zheng J, et al. Contact Settings and Risk for  
517 Transmission in 3410 Close Contacts of Patients With COVID-19 in Guangzhou,  
518 China. *Annals of Internal Medicine*. 2020.
- 519 26. Chen M, Fan P, Liu Z, Pan R, Huang S, Li J, et al. A SARS-CoV-2 familial cluster  
520 infection reveals asymptomatic transmission to children. *Journal of Infection and  
521 Public Health*. 2020;13(6):883-6.
- 522 27. Hong LX, Lin A, He ZB, Zhao HH, Zhang JG, Zhang C, et al. Mask wearing in pre-  
523 symptomatic patients prevents SARS-CoV-2 transmission: An epidemiological  
524 analysis. *Travel Medicine and Infectious Disease*. 2020;36 (no pagination):101803.
- 525 28. Li P, Fu JB, Li KF, Liu JN, Wang HL, Liu LJ, et al. Transmission of COVID-19 in the  
526 terminal stages of the incubation period: A familial cluster. *International Journal of  
527 Infectious Diseases*. 2020;96:452-3.
- 528 29. Qian G, Yang N, Ma AHY, Wang L, Li G, Chen X, et al. A COVID-19 Transmission  
529 within a family cluster by presymptomatic infectors in China. *Clinical infectious  
530 diseases : an official publication of the Infectious Diseases Society of America*. 2020.
- 531 30. 庞秋艳, 李朋, 李天忠, 李化 . [1]一起高速服务区新型冠状病毒肺炎聚集性疫情调查.  
532 *安徽预防医学杂志*. 2020;26(02):130-2.
- 533 31. 钱丽珍, 郑志强, 洪万胜, 孙芳红, 吴方楠, 金瑞盈.  
534 [2]瑞安市一起新型冠状病毒肺炎聚集性疫情调查. *预防医学*. 2020;32(05):486-8+91.
- 535 32. 阳雅兰, 李林洪, 李长凤, 肖玉春, 彭君.  
536 [3]重庆市一起新型冠状病毒肺炎家庭聚集性疫情调查分析. *中国公共卫生*.  
537 2020;36(03):285-8.
- 538 33. Zhao H, Li BS, Xia Y, Zhou HL, Li TR, Zeng Y, et al. Investigation of transmission  
539 chain of a cluster COVID-19 cases. *Chung-Hua Liu Hsing Ping Hsueh Tsa Chih  
540 Chinese Journal of Epidemiology*. 2020;41(0):E064.
- 541 34. Chau NVV, Thanh Lam V, Thanh Dung N, Yen LM, Minh NNQ, Hung LM, et al. The  
542 natural history and transmission potential of asymptomatic SARS-CoV-2 infection.  
543 *Clinical Infectious Diseases*. 2020.
- 544 35. Cevik M, Tate M, Lloyd O, Maraolo AE, Schafers J, Ho A. SARS-CoV-2, SARS-CoV-  
545 1 and MERS-CoV viral load dynamics, duration of viral shedding and infectiousness:  
546 a living systematic review and meta-analysis. *medRxiv*. 2020:2020.07.25.20162107.
- 547 36. Peak CM, Kahn R, Grad YH, Childs LM, Li R, Lipsitch M, et al. Individual quarantine  
548 versus active monitoring of contacts for the mitigation of COVID-19: a modelling  
549 study. *The Lancet Infectious Diseases*.

## Transmission dynamics and secondary attack rates

- 550 37. Bi Q, Wu Y, Mei S, Ye C, Zou X, Zhang Z, et al. Epidemiology and transmission of  
551 COVID-19 in 391 cases and 1286 of their close contacts in Shenzhen, China: a  
552 retrospective cohort study. *The Lancet Infectious Diseases*.  
553 38. Dillon Adam PW, Jessica Wong et al. Clustering and superspreading potential of  
554 severe acute respiratory syndrome coronavirus 2 (SARS-CoV-2) infections in Hong  
555 Kong  
556 . PREPRINT (Version 1) available at Research Square 2020.  
557 39. Wang Y, Tian H, Zhang L, Zhang M, Guo D, Wu W, et al. Reduction of secondary  
558 transmission of SARS-CoV-2 in households by face mask use, disinfection and  
559 social distancing: a cohort study in Beijing, China. *BMJ Global Health*.  
560 2020;5(5):e002794.  
561 40. Böhmer MM, Buchholz U, Corman VM, Hoch M, Katz K, Marosevic DV, et al.  
562 Investigation of a COVID-19 outbreak in Germany resulting from a single travel-  
563 associated primary case: a case series. *The Lancet Infectious Diseases*.  
564 41. Leclerc QJ FN, Knight LE. What settings have been linked to SARS-CoV-2  
565 transmission clusters? [version 1; peer review: 1 approved with reservations].  
566 *Wellcome Open Res* 2020;5:83  
567 42. Madewell ZJ, Yang Y, Longini IM, Halloran ME, Dean NE. Household transmission of  
568 SARS-CoV-2: a systematic review and meta-analysis of secondary attack rate.  
569 *medRxiv*. 2020:2020.07.29.20164590.  
570 43. Meyerowitz E, Richterman, A., Bogoch, I., Low, N., Cevik, M. Towards an Accurate  
571 and Systematic Characterization of Persistently Asymptomatic Infection with SARS-  
572 CoV-2  
573 . SSRN Electronic Journal. 2020.  
574
